# Supplementary material
Source: PubMed Central journal article supplement (PMC8107133)
Supplement: NIHMS1680101-supplement-Supplementary___Appendix__online_only_material__etc__.pdf [file NIHMS1680101-supplement-Supplementary___Appendix__online_only_material__etc__.pdf]

## SUPPLEMENTARY FIGURES

Figure S1. Dose of ERT administered in CRIM-negative IPD patients treated with ERT+ITI

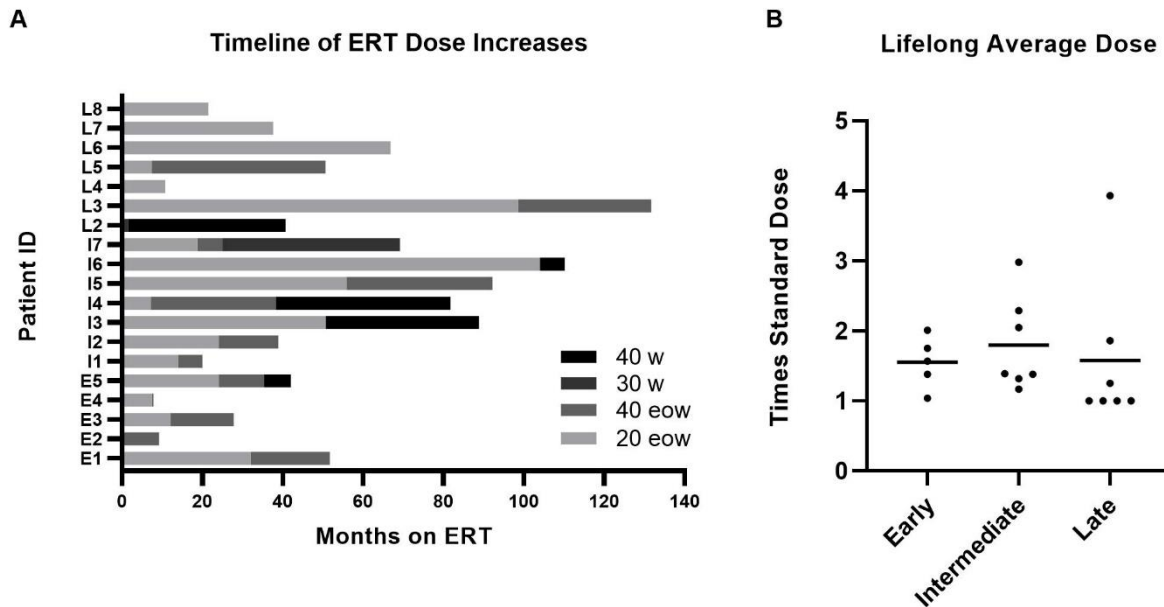

**A. Dose of ERT received over the course of study.** For consistency, ERT doses of 20 mg/kg weekly were considered to be the same as 40 mg/kg every other week. By the time of final assessment, all patients in the ETG (patients E1-E5) and the ITG (patients I1-I7) were receiving a higher dose than the standard 20 mg/kg EOW. Of the seven patients with available dosing data in the late treatment group (L2-L8), only three were receiving an increased ERT dose by final assessment. The median age at dose escalation was 12.6 months (0-32.1 months, n=5), 25.5 months (8.9-107 months, n=7), and 11.8 months (4.1-102.4 months, n=3) in the ETG, ITG, and LTG, respectively. The median time on ERT at dose escalation was 12.1 months (0-32.0 months, n=5), 24.1 months (7.1-104 months, n=7), and 7.4 months (0.5-98.6 months, n=3) in the ETG, ITG, and LTG respectively. There was no significant difference in either median age or median time on ERT at dose escalation between groups.

**B. Lifetime average dose.** Lifetime average dose was calculated based on a previously published method, using the product between the proportion of time the patient spent receiving each dose and a multiplier relative to the standard labeled dose of 20 mg/kg EOW. For example, if a patient spent 1/3 of the time receiving 20 mg/kg EOW, and 2/3 of the time receiving 40 mg/kg EOW, the lifetime average dose would be  $1 \times 1/3 + 2 \times 2/3 = 1.67$ . Both 40 mg/kg EOW and 20 mg/kg W were considered twice the standard dose and assigned a multiplier of 2.

Figure S2. Anti-rhGAA IgG antibodies in patients treated with ERT+ITI and ERT monotherapy

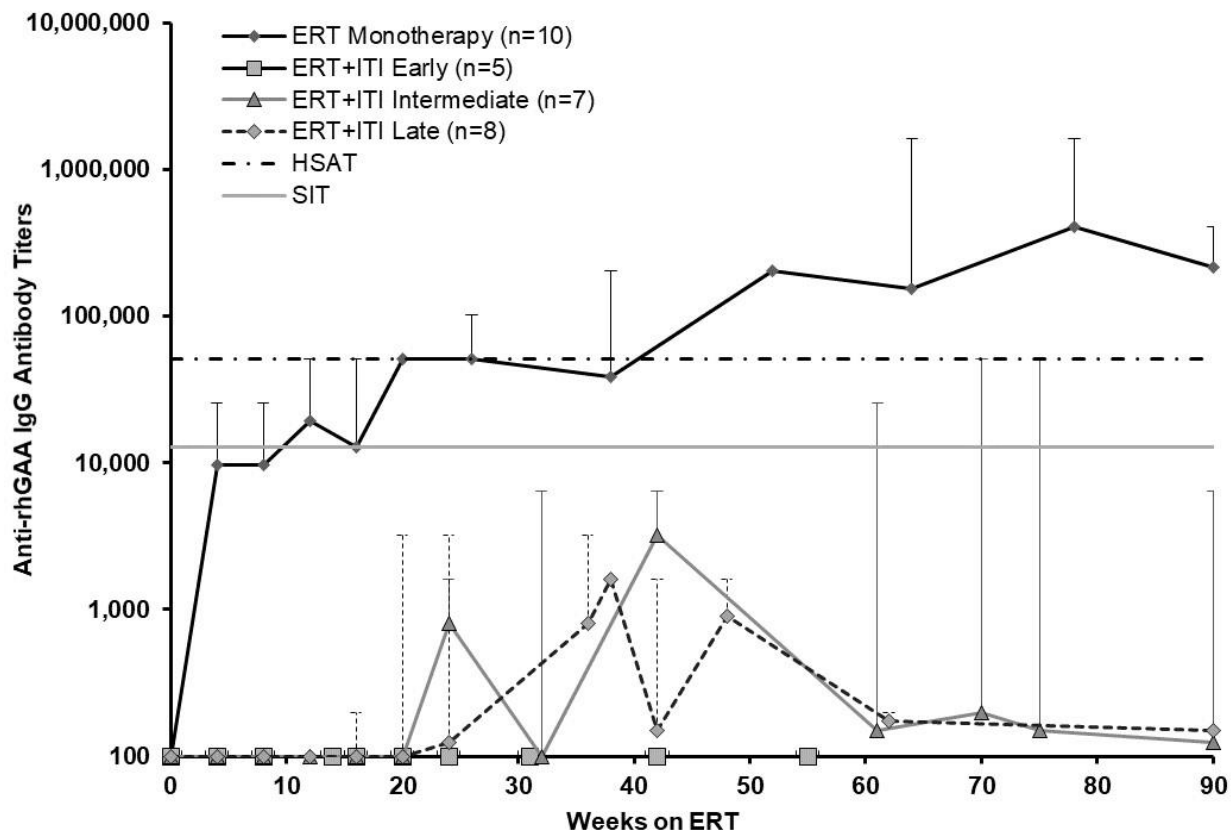

Median peak titer was significantly lower in patients treated with ERT+ITI at 0 (n=20, range 0-51,200) than those treated with ERT monotherapy, who had median peak titer of 204,800 (n=10, range 25,600 – 1,638,400). All patients in the early treatment group remained seronegative.
